# Supplementary material for: Feasibility of dispersive liquid–liquid microextraction to determine Ca, Mg, K, and Na in biodiesel by atomic spectrometry
Source: Royal Society of Chemistry journal article supplement (doi:10.1039/c8ay00770e), 2018-01-01
Supplement: c8ay00770e1.pdf [file c8ay00770e1.pdf]

## Analytical Methods – Electronic Supplementary Information

### Feasibility of Dispersive Liquid-Liquid Microextraction to Determine Ca, Mg, K, and Na in Biodiesel by Atomic Spectrometry

Kássia Roberta Nogueira da Silva<sup>a</sup>, Anderson dos Santos Greco<sup>b</sup>, Marcela Zanetti Corazza<sup>b</sup>, Jorge Luiz Raposo Jr<sup>a,b\*</sup>

<sup>a</sup>Institute of Chemistry, Federal University of Mato Grosso do Sul, PO Box 549, Zip Code 79070-900, Campo Grande, MS, Brazil.

<sup>b</sup>Faculty of Exact Sciences and Technology, Federal University of Grande Dourados, Highway Dourados-Itahum, km 12, PO Box 364, Zip Code 79804-970, Dourados, MS, Brazil.

\*Corresponding author: [jorgeluizraposo@gmail.com](mailto:jorgeluizraposo@gmail.com)

#### S.1. Production and characterization of biodiesel

The *Helianthus annuus*, *Brassica napus* L., *Jatropha curcas* and *Crambe Hochst abyssinica* oilseed provided by Embrapa Agropecuária Oeste (Dourados, MS, Brazil) were firstly thoroughly washed with running tap water and after with deionized water. An amount of 2000 g of cleaned samples were dried at room temperature for 24 h and after at 70 °C for 60 h in a forced air oven. All amounts of the seeds were ground in a stainless steel mill and stored in individual plastic bags.

For extraction of the oil, an amount of 1320 g *Jatropha curcas*, 1653 g *Helianthus annuus*, 1767 g *Crambe Hochst abyssinica*, and 1680 g *Brassica napus* L. powdered seed sample were placed in a Soxhlet system, and the crude vegetable oils were extracted during 6 h at 70 °C using 600 mL of hexane. The oils were separated from the hexane under reduced temperature and pressure by refluxing at 60 °C. The crude vegetable oils were submitted to degumming process, and stored in a 500 mL-amber glass at 4 °C.

Using the *Jatropha curcas*, *Helianthus annuus*, *Crambe Hochst abyssinica*, and *Brassica napus* L. crude oils, the biodiesel were produced by alkali-catalyzed (KOH) transesterification route.<sup>1</sup> The mixtures were kept at 45 °C for 90 min under stirring. The produced biodiesels were transferred into a separation funnel to complete separation of biodiesel/glycerol during 12h. The layers contained glycerol were appropriated discarded. The final biodiesel were washed with sodium chloride,<sup>2</sup> and dried with sodium sulfate before storage.<sup>3-4</sup> To avoid oxidation of the samples, an amount of propyl gallate was added in order to contain 500 mg kg<sup>-1</sup>.<sup>5</sup>

Preliminary, physicochemical analyses were done according to standards methods, such as kinematic viscosity at 40 °C (ASTM D445),<sup>6</sup> specific mass at 20 °C (ASTM D4052),<sup>7</sup> acid value (ASTM EN 14104),<sup>8</sup> and water content (ASTM D6304).<sup>9</sup>

#### S.2. Biodiesel preliminary laboratorial analysis

According to the quantity of *Jatropha curcas* (1320 g), *Helianthus annuus* (1653 g), *Crambe Hochst abyssinica* (1767 g), and *Brassica napus* L. (1680 g) oilseed weighed as raw matter, an amount of 514.4 and 255.3 g, 644.8 and 376.2 g, 671.6 and 329.6 g, and 571.1 and 240.5 g of vegetable oil and biodiesel were obtained, respectively. It is important to point out that the amount of vegetable oil extracted from the selected oilseed is higher than those observed in the literature for soybean and cotton.<sup>10-12</sup>

Some physicochemical properties are performed to evaluate the quality of each biodiesel based on the values recommended by National Agency of Petroleum, Natural Gas and Biofuels (ANP) in ANP Resolution No. 45/2014.<sup>13</sup> The following properties, density, acid number, water content and kinematic viscosity of the biodiesel samples are shown in Table S1. According to ANP Resolution No. 45/2014,<sup>13</sup> all alternative biodiesel samples presented density and viscosity in the ranges of 850-900 kg m<sup>-3</sup> and 3.0-6.0 mm<sup>2</sup> s<sup>-1</sup>, respectively. About acid number, and water content, the values obtained were lower than 0.5 mg KOH g<sup>-1</sup>, and

200 mg kg<sup>-1</sup>, respectively. The problems related to higher densities of the biodiesel,<sup>14</sup> high acidity levels,<sup>15</sup> high water content,<sup>10</sup> and high viscosity<sup>16</sup> are best described in specific literature.

**Table S1** Physicochemical parameters obtained for the renewable biodiesel samples

| Sample                          | Physicochemical parameters       |                                          |                                         |                                                            |
|---------------------------------|----------------------------------|------------------------------------------|-----------------------------------------|------------------------------------------------------------|
|                                 | Density<br>(kg m <sup>-3</sup> ) | Acid number<br>(mg KOH g <sup>-1</sup> ) | Water content<br>(mg kg <sup>-1</sup> ) | Kinematic viscosity*<br>(mm <sup>2</sup> s <sup>-1</sup> ) |
| <i>Jatropha curcas</i>          | 852                              | 0.4                                      | 150                                     | 3.3                                                        |
| <i>Helianthus annuus</i>        | 859                              | 0.2                                      | 100                                     | 4.8                                                        |
| <i>Crambe Hochst abyssinica</i> | 858                              | 0.4                                      | 100                                     | 3.3                                                        |
| <i>Brassica napus</i> L.        | 855                              | 0.2                                      | 150                                     | 3.2                                                        |
| ANP 45/2014 <sup>13</sup>       | 850-900                          | <0.5                                     | <200                                    | 3.0-6.0                                                    |

\*Kinematic viscosity at 40 °C.

**Table S2.** Factors, levels and recoveries of 2<sup>4</sup> full factorial design used to evaluate the DLLME sample preparation procedure.

| Factor                              | Level   |          |
|-------------------------------------|---------|----------|
|                                     | Low (-) | High (+) |
| Mass (g)                            | 1.0     | 3.0      |
| Volume (μL)                         | 300     | 1000     |
| Nitric acid:isopropyl alcohol (v/v) | 3:1     | 1:3      |
| HNO <sub>3</sub> (%)                | 0.5     | 5.0      |

  

| Exp. | Mass | Volume | Nitric acid:isopropyl alcohol | HNO <sub>3</sub> | Recovery (%) |       |       |       |
|------|------|--------|-------------------------------|------------------|--------------|-------|-------|-------|
|      |      |        |                               |                  | Ca           | Mg    | Na    | K     |
| 1    | -    | -      | -                             | -                | 20.3         | 70.8  | 103.0 | 62.4  |
| 2    | +    | -      | -                             | -                | 44.6         | 82.8  | 96.6  | 86.5  |
| 3    | -    | +      | -                             | -                | 39.5         | 87.7  | 108.8 | 79.0  |
| 4    | +    | +      | -                             | -                | 93.0         | 112.4 | 122.8 | 113.3 |
| 5    | -    | -      | +                             | -                | 14.0         | 36.7  | 68.0  | 33.2  |
| 6    | +    | -      | +                             | -                | 5.5          | 24.0  | 46.7  | 38.8  |
| 7    | -    | +      | +                             | -                | 56.6         | 103.2 | 115.5 | 90.5  |
| 8    | +    | +      | +                             | -                | 70.4         | 92.5  | 100.6 | 94.0  |
| 9    | -    | -      | -                             | +                | 46.1         | 92.1  | 103.8 | 82.4  |
| 10   | +    | -      | -                             | +                | 78.2         | 92.3  | 91.7  | 87.0  |
| 11   | -    | +      | -                             | +                | 90.2         | 113.8 | 130.8 | 101.8 |
| 12   | +    | +      | -                             | +                | 104.6        | 119.0 | 121.6 | 112.7 |
| 13   | -    | -      | +                             | +                | 36.2         | 76.7  | 86.1  | 67.3  |
| 14   | +    | -      | +                             | +                | 47.1         | 52.2  | 51.2  | 48.9  |
| 15   | -    | +      | +                             | +                | 66.0         | 105.9 | 124.3 | 97.0  |
| 16   | +    | +      | +                             | +                | 98.5         | 106.6 | 108.1 | 101.9 |

Conditions: 5 min of thermostatic bath at 80 °C, 30 s of vortex shaking, 3 min of ultrasound bath and 15 min of centrifugation.

**Table S3.** Recoveries obtained for the Doehlert matrix design used to establish the volume of extraction solution and nitric acid concentration in DLLME

| Exp. | Volume ( $\mu\text{L}$ ) | $\text{HNO}_3$ (%) | Recovery (%) |       |       |       |
|------|--------------------------|--------------------|--------------|-------|-------|-------|
|      |                          |                    | Ca           | Mg    | Na    | K     |
| 1    | 800 (0)                  | 5.0 (0)            | 106.0        | 102.1 | 106.1 | 101.9 |
| 2    | 800 (0)                  | 5.0 (0)            | 106.6        | 102.9 | 109.5 | 103.5 |
| 3    | 800 (0)                  | 5.0 (0)            | 107.2        | 102.4 | 107.9 | 103.6 |
| 4    | 1200 (1,0)               | 5.0 (0)            | 60.5         | 99.2  | 106.2 | 97.4  |
| 5    | 1000 (0.5)               | 7.0 (0.866)        | 62.0         | 95.8  | 101.4 | 97.2  |
| 6    | 400 (-1.0)               | 5.0 (0)            | 65.7         | 72.0  | 96.6  | 87.1  |
| 7    | 600 (-0.5)               | 3.0 (-0.866)       | 65.6         | 87.4  | 94.0  | 87.1  |
| 8    | 1000 (0.5)               | 3.0 (-0.866)       | 58.4         | 93.6  | 96.7  | 83.7  |
| 9    | 600 (-0.5)               | 7.0 (0.866)        | 65.3         | 78.2  | 95.4  | 76.1  |

The numbers in parentheses represents the Doehlert matrix coded values. Conditions used in this experiment: 3.0 g of sample mass, 3:1 (v/v) of nitric acid:isopropyl alcohol, 5 min of thermostatic bath at 80 °C, 30 s of vortex shaking, 3 min of ultrasound bath and 15 min of centrifugation.

**Table S4.** ANOVA for linear model fit from the Doehlert matrix design for the results showed for Ca in Table S3

|                                  | SS       | DF | MS       | $F_{\text{calculated}}$ | $P_{\text{value}}$ |
|----------------------------------|----------|----|----------|-------------------------|--------------------|
| <b>(1) Volume (L)</b>            | 36.855   | 1  | 36.855   | 107.481                 | 0.009176           |
| <b>Volume (Q)</b>                | 2268.091 | 1  | 2268.091 | 6614.438                | 0.000151           |
| <b>(2) [HNO<sub>3</sub>] (L)</b> | 2.608    | 1  | 2.608    | 7.606                   | 0.110166           |
| <b>[HNO<sub>3</sub>] (Q)</b>     | 2313.179 | 1  | 2313.179 | 6745.928                | 0.000148           |
| <b>1L by 2L</b>                  | 3.861    | 1  | 3.861    | 11.260                  | 0.078492           |
| <b>Lack of fit</b>               | 4.753    | 1  | 4.753    | 13.860                  | 0.065176           |
| <b>Pure error</b>                | 0.686    | 2  | 0.343    |                         |                    |
| <b>Total</b>                     | 3866.534 | 8  |          |                         |                    |

SS = sum of square, DF = degree of freedom, MS = means of square.

**Table S5.** ANOVA for linear model fit from the Doehlert matrix design for the results showed for Mg in Table S3

|                                  | <b>SS</b> | <b>DF</b> | <b>MS</b> | <b>F<sub>calculated</sub></b> | <b>P<sub>value</sub></b> |
|----------------------------------|-----------|-----------|-----------|-------------------------------|--------------------------|
| <b>(1) Volume (L)</b>            | 509.734   | 1         | 509.7337  | 2673.896                      | 0.000374                 |
| <b>Volume (Q)</b>                | 342.259   | 1         | 342.2590  | 1795.378                      | 0.000557                 |
| <b>(2) [HNO<sub>3</sub>] (L)</b> | 12.006    | 1         | 12.0062   | 62.981                        | 0.015509                 |
| <b>[HNO<sub>3</sub>] (Q)</b>     | 192.685   | 1         | 192.6854  | 1010.764                      | 0.000988                 |
| <b>1L by 2L</b>                  | 32.661    | 1         | 32.6612   | 171.330                       | 0.005786                 |
| <b>Lack of fit</b>               | 1.882     | 1         | 1.8816    | 9.870                         | 0.088127                 |
| <b>Pure error</b>                | 0.381     | 2         | 0.1906    |                               |                          |
| <b>Total</b>                     | 1006.896  | 8         |           |                               |                          |

SS = sum of square, DF = degree of freedom, MS = means of square.

**Table S6.** ANOVA for linear model fit from the Doehlert matrix design for the results showed for Na in Table S3

|                                  | <b>SS</b> | <b>DF</b> | <b>MS</b> | <b>F<sub>calculated</sub></b> | <b>P<sub>value</sub></b> |
|----------------------------------|-----------|-----------|-----------|-------------------------------|--------------------------|
| <b>(1) Volume (L)</b>            | 64.8210   | 1         | 64.8210   | 22.15876                      | 0.042287                 |
| <b>Volume (Q)</b>                | 49.1520   | 1         | 49.1520   | 16.80238                      | 0.054680                 |
| <b>(2) [HNO<sub>3</sub>] (L)</b> | 9.5172    | 1         | 9.5172    | 3.25342                       | 0.2113047                |
| <b>[HNO<sub>3</sub>] (Q)</b>     | 186.6011  | 1         | 186.6011  | 63.78870                      | 0.015317                 |
| <b>1L by 2L</b>                  | 2.8056    | 1         | 2.8056    | 0.95909                       | 0.430688                 |
| <b>Lack of fit</b>               | 0.1380    | 1         | 0.1380    | 0.04718                       | 0.848189                 |
| <b>Pure error</b>                | 5.8506    | 2         | 2.9253    |                               |                          |
| <b>Total</b>                     | 288.8046  | 8         |           |                               |                          |

SS = sum of square, DF = degree of freedom, MS = means of square.

**Table S7.** ANOVA for linear model fit from the Doehlert matrix design for the results showed for K in Table S3

|                                  | SS       | DF | MS       | F <sub>calculated</sub> | P <sub>value</sub> |
|----------------------------------|----------|----|----------|-------------------------|--------------------|
| <b>(1) Volume (L)</b>            | 121.7944 | 1  | 121.7944 | 140.6998                | 0.007032           |
| <b>Volume (Q)</b>                | 137.6021 | 1  | 137.6021 | 158.9612                | 0.006232           |
| <b>(2) [HNO<sub>3</sub>] (L)</b> | 1.6512   | 1  | 1.6512   | 1.9075                  | 0.301310           |
| <b>[HNO<sub>3</sub>] (Q)</b>     | 435.8641 | 1  | 435.8641 | 503.5204                | 0.001980           |
| <b>1L by 2L</b>                  | 149.4506 | 1  | 149.4506 | 172.6489                | 0.005742           |
| <b>Lack of fit</b>               | 8.8817   | 1  | 8.8817   | 10.2603                 | 0.085193           |
| <b>Pure error</b>                | 1.7313   | 2  | 0.8656   |                         |                    |
| <b>Total</b>                     | 778.8283 | 8  |          |                         |                    |

SS = sum of square, DF = degree of freedom, MS = means of square.

## References

- 1 C. C. Enweremadu, M. M. Mbarawa, *Renew. Sust. Energ. Rev.*, 2009, **13**, 2205-2224.
- 2 A. N. Phan, T. M. Phan, *Fuel*, 2008, **87**, 3490-3496.
- 3 J. M. Dias, M. C. M. Alvim-Ferraz, M. F. Almeida, *Fuel*, 2008, **87**, 3572-3578.
- 4 Z. J. Predojević, *Fuel*, 2008, **87**, 3522-3528.
- 5 A. C. Roveda, M. Comim, A. R. L. Caires, V. S. Ferreira, M. A. G. Trindade, *Energy*, 2016, **109**, 260-265.
- 6 ASTM D445-15, Standard Test Method for Kinematic Viscosity of Transparent and Opaque Liquids (and Calculation of Dynamic Viscosity), ASTM International, West Conshohocken, 2015.
- 7 ASTM D4052-16, Standard Test Method for Density, Relative Density, and API Gravity of Liquids by Digital Density Meter, ASTM International, West Conshohocken, 2016.
- 8 EN 14104: Fat and Oil Derivatives – Fatty Acid Methyl Esters (FAME), Determination of Acid Value, European Committee for Standardization, Berlin, 2003.
- 9 ASTM D6304-16E1, Standard Test Method for Determination of Water in Petroleum Products, Lubricating Oils, and Additives by Coulometric Karl Fisher Titration, ASTM International, West Conshohocken, 2016.
- 10 H. M. Mahmudul, F. Y. Hagos, R. Mamat, A. A. Adam, W. F. W. Ishak, R. Alenezi, *Renew. Sust. Energ. Rev.*, 2017, **72**, 497-509.
- 11 W. N. M. W. Ghazali, R. Mamat, H. H. Masjuki, G. Najafi, *Renew. Sust. Energ. Rev.*, 2015, **51**, 585-602.
- 12 I. A. Panagiotopoulos, S. Pasias, R. R. Bakker, T. de Vrije, N. Papayannakos, P. A. M. Claassen, E. G. Koukios, *Bioresour. Technol.*, 2013, **136**, 78-86.
- 13 Resolution of the Petroleum National Agency (ANP) N° 45 de 25.08.2014.
- 14 M. Gülüm, A. Bilgin, *Fuel Process. Technol.*, 2015, **134**, 456-464.
- 15 F. M. Pereira, D. M. Brum, F. G. Lepri, R. J. Cassella, *Microchem. J.*, 2014, **117**, 172-177.
- 16 A. D. Batista, R. S. Amais, F. R. P. Rocha, *Microchem. J.*, 2016, **124**, 55-59.
